# Supplementary material for: A systematic review and standardized clinical validity assessment of male infertility genes
Source: PubMed Central journal article supplement (PMC6505449; doi:10.1093/humrep/dez022), 2019-03-13
Supplement: dez022_supplementary_table_six.pdf [file dez022_supplementary_table_six.pdf]

**Supplementary Table SIX Gene names and definitions of genes at least moderately linked to male infertility (Fig. 3).**

| Gene symbol | Gene definition                                                              | HUGO Gene Nomenclature ID |
|-------------|------------------------------------------------------------------------------|---------------------------|
| ADGRG2      | adhesion G protein-coupled receptor G2                                       | HGNC:4516                 |
| AMH         | anti-Mullerian hormone                                                       | HGNC:464                  |
| AMHR2       | anti-Mullerian hormone receptor type 2                                       | HGNC:465                  |
| ANOS1       | anosmin 1                                                                    | HGNC:6211                 |
| APOA1       | apolipoprotein A1                                                            | HGNC:600                  |
| AR          | androgen receptor                                                            | HGNC:644                  |
| AURKC       | aurora kinase C                                                              | HGNC:11391                |
| BNC2        | basonuclein 2                                                                | HGNC:30988                |
| CCDC141     | coiled-coil domain containing 141                                            | HGNC:26821                |
| CCDC39      | coiled-coil domain containing 39                                             | HGNC:25244                |
| CCDC40      | coiled-coil domain containing 40                                             | HGNC:26090                |
| CDC14A      | cell division cycle 14A                                                      | HGNC:1718                 |
| CEP290      | centrosomal protein 290                                                      | HGNC:29021                |
| CFAP43      | cilia and flagella associated protein 43                                     | HGNC:26684                |
| CFAP44      | cilia and flagella associated protein 44                                     | HGNC:25631                |
| CFAP69      | cilia and flagella associated protein 69                                     | HGNC:26107                |
| CFTR        | cystic fibrosis transmembrane conductance regulator                          | HGNC:1884                 |
| CHD7        | chromodomain helicase DNA binding protein 7                                  | HGNC:20626                |
| CYP11A1     | cytochrome P450 family 11 subfamily A member 1                               | HGNC:2590                 |
| CYP11B1     | cytochrome P450 family 11 subfamily B member 1                               | HGNC:2591                 |
| CYP17A1     | cytochrome P450 family 17 subfamily A member 1                               | HGNC:2593                 |
| CYP19A1     | cytochrome P450 family 19 subfamily A member 1                               | HGNC:2594                 |
| CYP21A2     | cytochrome P450 family 21 subfamily A member 2                               | HGNC:2600                 |
| DCC         | DCC netrin 1 receptor                                                        | HGNC:2701                 |
| DMRT1       | doublesex and mab-3 related transcription factor 1                           | HGNC:2934                 |
| DNAAF2      | dynein axonemal assembly factor 2                                            | HGNC:20188                |
| DNAAF4      | dynein axonemal assembly factor 4                                            | HGNC:21493                |
| DNAH1       | dynein axonemal heavy chain 1                                                | HGNC:2940                 |
| DPY19L2     | dpy-19 like 2                                                                | HGNC:19414                |
| FANCA       | FA complementation group A                                                   | HGNC:3582                 |
| FANCM       | FA complementation group M                                                   | HGNC:23168                |
| FGF8        | fibroblast growth factor 8                                                   | HGNC:3686                 |
| FGFR1       | fibroblast growth factor receptor 1                                          | HGNC:3688                 |
| FSHB        | follicle stimulating hormone subunit beta                                    | HGNC:3964                 |
| FSHR        | follicle stimulating hormone receptor                                        | HGNC:3969                 |
| GATA4       | GATA binding protein 4                                                       | HGNC:4173                 |
| GNRH1       | gonadotropin releasing hormone 1                                             | HGNC:4419                 |
| GNRHR       | gonadotropin releasing hormone receptor                                      | HGNC:4421                 |
| HS6ST1      | heparan sulfate 6-O-sulfotransferase 1                                       | HGNC:5201                 |
| HSD17B3     | hydroxysteroid 17-beta dehydrogenase 3                                       | HGNC:5212                 |
| HSD3B2      | hydroxy-delta-5-steroid dehydrogenase, 3 beta- and steroid delta-isomerase 2 | HGNC:5218                 |
| HSF2        | heat shock transcription factor 2                                            | HGNC:5225                 |
| INSL3       | insulin like 3                                                               | HGNC:6086                 |
| KISS1R      | KISS1 receptor                                                               | HGNC:4510                 |
| KLHL10      | kelch like family member 10                                                  | HGNC:18829                |
| LHB         | luteinizing hormone beta polypeptide                                         | HGNC:6584                 |
| LHCGR       | luteinizing hormone/choriogonadotropin receptor                              | HGNC:6585                 |

*Continued*

**Supplementary Table SIX** *Continued*

| <b>Gene symbol</b> | <b>Gene definition</b>                                         | <b>HUGO Gene Nomenclature ID</b> |
|--------------------|----------------------------------------------------------------|----------------------------------|
| LRRC6              | leucine rich repeat containing 6                               | HGNC:16725                       |
| MAMLD1             | mastermind like domain containing 1                            | HGNC:2568                        |
| NLRP3              | NLR family pyrin domain containing 3                           | HGNC:16400                       |
| NR0B1              | nuclear receptor subfamily 0 group B member 1                  | HGNC:7960                        |
| NR5A1              | nuclear receptor subfamily 5 group A member 1                  | HGNC:7983                        |
| PIH1D3             | PIH1 domain containing 3                                       | HGNC:28570                       |
| PKD1               | polycystin 1, transient receptor potential channel interacting | HGNC:9008                        |
| PLCZ1              | phospholipase C zeta 1                                         | HGNC:19218                       |
| PLXNA1             | plexin A1                                                      | HGNC:9099                        |
| PMFBP1             | polyamine modulated factor 1 binding protein 1                 | HGNC:17728                       |
| PROK2              | prokineticin 2                                                 | HGNC:18455                       |
| PROKR2             | prokineticin receptor 2                                        | HGNC:15836                       |
| RSPO1              | R-spondin 1                                                    | HGNC:21679                       |
| SEMA3A             | semaphorin 3A                                                  | HGNC:10723                       |
| SOX10              | SRY-box 10                                                     | HGNC:11190                       |
| SOX2               | SRY-box 2                                                      | HGNC:11195                       |
| SOX3               | SRY-box 3                                                      | HGNC:11199                       |
| SOX9               | SRY-box 9                                                      | HGNC:11204                       |
| SPATA16            | spermatogenesis associated 16                                  | HGNC:29935                       |
| SRD5A2             | steroid 5 alpha-reductase 2                                    | HGNC:11285                       |
| SRY                | sex determining region Y                                       | HGNC:11311                       |
| SUN5               | Sad1 and UNC84 domain containing 5                             | HGNC:16252                       |
| SYCP3              | synaptonemal complex protein 3                                 | HGNC:18130                       |
| TACR3              | tachykinin receptor 3                                          | HGNC:11528                       |
| TEX11              | testis expressed 11                                            | HGNC:11733                       |
| TEX15              | testis expressed 15, meiosis and synapsis associated           | HGNC:11738                       |
| TRIM37             | tripartite motif containing 37                                 | HGNC:7523                        |
| WDR11              | WD repeat domain 11                                            | HGNC:13831                       |
| WDR66              | WD repeat domain 66                                            | HGNC:28506                       |
| WT1                | Wilms tumor 1                                                  | HGNC:12796                       |
| XRCC2              | X-ray repair cross complementing 2                             | HGNC:12829                       |
