# Supplementary material for: A systematic review and standardized clinical validity assessment of male infertility genes
Source: PubMed Central journal article supplement (PMC6505449; doi:10.1093/humrep/dez022), 2019-03-13
Supplement: dez022_supplementary_table_svii.pdf [file dez022_supplementary_table_svii.pdf]

## Supplementary Table SVII Recommendations for reporting of sequencing variants.

| Topic                                 | Recommendation                                                                                                                                                                                                                                                                                                                                                                                                                                                                                                                                                                                                                                              |
|---------------------------------------|-------------------------------------------------------------------------------------------------------------------------------------------------------------------------------------------------------------------------------------------------------------------------------------------------------------------------------------------------------------------------------------------------------------------------------------------------------------------------------------------------------------------------------------------------------------------------------------------------------------------------------------------------------------|
| Variant calling                       | To ensure reliable results, establish the variant calling accuracy of the technique used and only report variants that meet a minimal level of accuracy                                                                                                                                                                                                                                                                                                                                                                                                                                                                                                     |
| Variant discovery                     | All relevant variants should be validated in an independent sequencing reaction to prevent reporting of false-positive results                                                                                                                                                                                                                                                                                                                                                                                                                                                                                                                              |
| Gene nomenclature                     | Use the standard HGNC nomenclature:<br><a href="https://www.genenames.org/about/guidelines">https://www.genenames.org/about/guidelines</a>                                                                                                                                                                                                                                                                                                                                                                                                                                                                                                                  |
| Variant nomenclature                  | Use the standard HGVS nomenclature:<br><a href="http://varnomen.hgvs.org/">http://varnomen.hgvs.org/</a>                                                                                                                                                                                                                                                                                                                                                                                                                                                                                                                                                    |
| Provide sequence reference            | All reported variants should include: <ul style="list-style-type: none"><li>• Genome build (e.g. GRCh37/hg19)</li><li>• Transcript ID (e.g. NM_198393.3)</li></ul>                                                                                                                                                                                                                                                                                                                                                                                                                                                                                          |
| Inheritance pattern                   | Report the expected or proven inheritance pattern. Note that the inheritance pattern between mice and human may be discordant<br>Public databases containing inheritance information:<br>OMIM (Human): <a href="https://www.omim.org/">https://www.omim.org/</a><br>MGI (Mouse): <a href="http://www.informatics.jax.org/">http://www.informatics.jax.org/</a><br>ClinGen (Human): <a href="https://search.clinicalgenome.org/kb/gene-validity/">https://search.clinicalgenome.org/kb/gene-validity/</a><br>Prediction of inheritance pattern:<br>Domino: <a href="https://www.fbm.unil.ch/domino/index.html">https://www.fbm.unil.ch/domino/index.html</a> |
| Classification of sequencing variants | If a gene has been linked to male infertility, apply the ACMG guidelines to classify the sequencing variants.<br>ACMG guidelines: <a href="https://www.acmg.net/docs/ACMG%20SG%20Interpretation%20of%20Sequence%20Variants%20GIM%20May%202015%20(3).pdf">https://www.acmg.net/docs/ACMG%20SG%20Interpretation%20of%20Sequence%20Variants%20GIM%20May%202015%20(3).pdf</a>                                                                                                                                                                                                                                                                                   |
