# Supplementary material for: A systematic review and standardized clinical validity assessment of male infertility genes
Source: PubMed Central journal article supplement (PMC6505449; doi:10.1093/humrep/dez022), 2019-03-13
Supplement: dez022_supplementary_table_sviii.pdf [file dez022_supplementary_table_sviii.pdf]

## Supplementary Table SVIII Recommendations for providing evidence for gene–disease relationships.

| Topic                              | Recommendation                                                                                                                                                                                                                                                                                                                                                                                                                                                                                                                                                                                                                                                                                                                                                                                                                                                                                                           |
|------------------------------------|--------------------------------------------------------------------------------------------------------------------------------------------------------------------------------------------------------------------------------------------------------------------------------------------------------------------------------------------------------------------------------------------------------------------------------------------------------------------------------------------------------------------------------------------------------------------------------------------------------------------------------------------------------------------------------------------------------------------------------------------------------------------------------------------------------------------------------------------------------------------------------------------------------------------------|
| Population frequency               | Public databases can be used with care. Please note that public databases contain female samples and infertile men. Local databases and/or healthy controls are preferred if available.<br>Examples of public databases: <ul style="list-style-type: none"><li>• GnomAD: <a href="http://gnomad.broadinstitute.org/">http://gnomad.broadinstitute.org/</a></li><li>• Exome Variant Server: <a href="http://evs.gs.washington.edu/EVS/">http://evs.gs.washington.edu/EVS/</a></li><li>• dbSNP: <a href="https://www.ncbi.nlm.nih.gov/SNP/">https://www.ncbi.nlm.nih.gov/SNP/</a></li></ul>                                                                                                                                                                                                                                                                                                                                |
| Segregation analysis               | Testing of parents and other family members preferred to establish if identified variant segregates with disease or occurred <i>de novo</i>                                                                                                                                                                                                                                                                                                                                                                                                                                                                                                                                                                                                                                                                                                                                                                              |
| Recurrence in affected individuals | Other patients with similar phenotypes should be tested for variants in same gene. If no patients are available, collaborative efforts and matchmaking services are recommended.<br>Example of matchmaking service:<br>Matchmaker Exchange: <a href="https://www.matchmakerexchange.org/">https://www.matchmakerexchange.org/</a>                                                                                                                                                                                                                                                                                                                                                                                                                                                                                                                                                                                        |
| Statistical evidence               | Gene burden analysis can be used to proof that a gene shows a statistical excess of rare variants in a patient cohort compared to control cohorts.                                                                                                                                                                                                                                                                                                                                                                                                                                                                                                                                                                                                                                                                                                                                                                       |
| In silico prediction               | Prediction models may be used to filter variants that are likely to be deleterious. Examples for missense variants: <ul style="list-style-type: none"><li>• SIFT: <a href="http://sift.jcvi.org/">http://sift.jcvi.org/</a></li><li>• MutationTaster: <a href="http://www.mutationtaster.org/">http://www.mutationtaster.org/</a></li><li>• PolyPhen2: <a href="http://genetics.bwh.harvard.edu/pph2/">http://genetics.bwh.harvard.edu/pph2/</a></li></ul> Examples for splice variants: <ul style="list-style-type: none"><li>• GeneSplicer: <a href="http://ccb.jhu.edu/software/genesplicer/">http://ccb.jhu.edu/software/genesplicer/</a></li><li>• Human Splicing Finder: <a href="http://www.umd.be/HSF3/">http://www.umd.be/HSF3/</a></li><li>• MaxEntScan: <a href="http://genes.mit.edu/burgelab/maxent/Xmaxentscan_scoreseq.html">http://genes.mit.edu/burgelab/maxent/Xmaxentscan_scoreseq.html</a></li></ul> |
| Gene expression                    | Report if the newly identified gene is expressed in relevant tissue(s). Expression can be studied in patient/healthy control material or through public databases.<br>Examples of public databases:<br>Protein Atlas: <a href="https://www.proteinatlas.org/">https://www.proteinatlas.org/</a><br>Expression Atlas: <a href="https://www.ebi.ac.uk/gxa/home">https://www.ebi.ac.uk/gxa/home</a>                                                                                                                                                                                                                                                                                                                                                                                                                                                                                                                         |
| Protein interaction                | Report if newly identified gene interacts with known disease genes. Interaction can be studied <i>in vitro</i> or through public databases.<br>Example of public database:<br>STRING: <a href="https://string-db.org/">https://string-db.org/</a>                                                                                                                                                                                                                                                                                                                                                                                                                                                                                                                                                                                                                                                                        |
| Functional validation              | Prove disruptive nature of identified sequencing variant in patient cells or in an <i>in vitro</i> model                                                                                                                                                                                                                                                                                                                                                                                                                                                                                                                                                                                                                                                                                                                                                                                                                 |
| <i>In vivo</i> evidence            | The phenotype of an animal model recapitulates the human phenotype. Preferably rescue experiments are performed.                                                                                                                                                                                                                                                                                                                                                                                                                                                                                                                                                                                                                                                                                                                                                                                                         |
